# Supplementary material for: A comprehensive single-cell map of T cell exhaustion-associated immune environments in human breast cancer
Source: PubMed Central journal article supplement (PMC9822999; doi:10.1038/s41467-022-35238-w), 2023-01-06
Supplement: 41467_2022_35238_MOESM3_ESM.pdf [file 41467_2022_35238_MOESM3_ESM.pdf]

## **Description of Additional Supplementary Files**

File Name: Supplementary Data 1

Description: Clinical Data.

File Name: Supplementary Data 2

Description: scRNASeq\_Data

File Name: Supplementary Data 3

Description: Cluster annotation data.

File Name: Supplementary Data 4

Description: Antibody panel information.

File Name: Supplementary Data 5

Description: Results of pseudobulk analyses.

File Name: Supplementary Data 6

Description: Gene lists for signatures.

File Name: Supplementary Data 7

Description: SingleCellSignalR output data.

File Name: Supplementary Data 8

Description: CellPhoneDB output data.

File Name: Supplementary Data 9

Description: IMC ROI information.
